# Supplementary material for: The Diguanylate Cyclase SadC Is a Central Player in Gac/Rsm-Mediated Biofilm Formation in Pseudomonas aeruginosa
Source: PubMed Central journal article supplement (PMC4248864; doi:10.1128/jb.01850-14), 2014-12
Supplement: JB.01850-14_zjb999093379so1.pdf [file JB.01850-14_zjb999093379so1.pdf]

## Supplementary material

**Table S1.** Strains, plasmids and primers used in this study.

| Strain/Plasmid/Primer                        | Relevant characteristics <sup>a</sup>                                                                                                                                                                                                                          | Source         |
|----------------------------------------------|----------------------------------------------------------------------------------------------------------------------------------------------------------------------------------------------------------------------------------------------------------------|----------------|
| <i>Escherichia coli</i>                      |                                                                                                                                                                                                                                                                |                |
| TOP10                                        | F <sup>-</sup> <i>mcrA</i> Δ( <i>mrr-hsdRMS-mcrBC</i> ) φ80 <i>lacZ</i> ΔM15 Δ <i>lacX74 recA1 araD139</i> Δ( <i>ara-leu</i> ) 7697 <i>galU galK rpsL</i> (Str <sup>R</sup> ) <i>endA1 nupG λ</i> <sup>-</sup>                                                 | Invitrogen     |
| OmniMAX                                      | F <sup>'</sup> { <i>proAB+ lacI</i> <sup>q</sup> <i>lacZ</i> ΔM15 Tn10(Tet <sup>R</sup> ) Δ( <i>ccdAB</i> )} <i>mcrA</i> Δ( <i>mrr-hsdRMS-mcrBC</i> ) Φ80 <i>lacZ</i> ΔM15 Δ( <i>lacZYA-argF</i> ) U169 <i>endA1 recA1 supE44 thi-1 gyrA96 relA1 tonA panD</i> | Invitrogen     |
| CC118λpir                                    | Host strain for pKNG101; D ( <i>ara-leu</i> ) <i>araD DlacX74 galE galK-phoA20 thi-1 rpsE rpoB argE</i> (Am) <i>recA1 Rf</i> <sup>+</sup> ( <i>lpir</i> )                                                                                                      | (1)            |
| 1047                                         | Helper strain for conjugation of plasmids harbouring pRK2013, Km <sup>R</sup>                                                                                                                                                                                  | Lab collection |
| S17-1                                        | F <sup>-</sup> , lambda (-), <i>endA</i> , <i>thi</i> , <i>pro</i> , <i>recA</i> , restriction (-) modification (+), RP4 derivative integrated into the chromosome with <i>Tet::Mu</i> , <i>Km::Tn7</i>                                                        | Lab collection |
| <i>Pseudomonas aeruginosa</i>                |                                                                                                                                                                                                                                                                |                |
| PAK                                          | Wild-type                                                                                                                                                                                                                                                      | (2)            |
| PAKΔ <i>retS</i>                             | PAK with a <i>retS</i> deletion                                                                                                                                                                                                                                | (2)            |
| PAKΔ <i>pelG</i>                             | PAK with a <i>pelG</i> deletion                                                                                                                                                                                                                                | (3)            |
| PAKΔ <i>retS</i> Δ <i>pelF</i>               | PAK with deletions of <i>retS</i> and <i>pelF</i>                                                                                                                                                                                                              | (4)            |
| PAKΔ <i>retS</i> ΔPA0338                     | PAK with deletions of <i>retS</i> and PA0338                                                                                                                                                                                                                   | This study     |
| PAKΔ <i>retS</i> Δ <i>sadC</i>               | PAK with deletions of <i>retS</i> and <i>sadC</i>                                                                                                                                                                                                              | This study     |
| PAKΔ <i>sadC</i>                             | PAK with a <i>sadC</i> deletion                                                                                                                                                                                                                                | This study     |
| PAKΔ <i>retS</i> Δ <i>sadB</i>               | PAK with deletions of <i>retS</i> and <i>sadB</i>                                                                                                                                                                                                              | This study     |
| PAKΔ <i>retS</i> Δ <i>sadC</i> Δ <i>bifA</i> | PAK with deletions of <i>retS</i> , <i>sadC</i> and <i>bifA</i>                                                                                                                                                                                                | This study     |
| PAKΔ <i>hptB</i>                             | PAK with a <i>hptB</i> deletion                                                                                                                                                                                                                                | (5)            |
| PAKΔ <i>hptB</i> Δ <i>sadC</i>               | PAK with deletions of <i>hptB</i> and <i>sadC</i>                                                                                                                                                                                                              | This study     |
| PAKΔ <i>hptB</i> Δ <i>sadB</i>               | PAK with deletions of <i>hptB</i> and <i>sadB</i>                                                                                                                                                                                                              | This study     |
| PAKΔ <i>rsmA</i>                             | PAK with a <i>rsmA</i> deletion                                                                                                                                                                                                                                | (6)            |
| PAKΔ <i>rsmA</i> Δ <i>sadC</i>               | PAK with deletions of <i>rsmA</i> and <i>sadC</i>                                                                                                                                                                                                              | This study     |
| PAKΔ <i>rsmYZ</i>                            | PAK with deletions of <i>rsmY</i> and <i>rsmZ</i>                                                                                                                                                                                                              | (5)            |
| PA01                                         | Wild-type                                                                                                                                                                                                                                                      | Lab collection |
| PA01 PA0338-Flag                             | PA01 containing PA0338 with a chromosomal C-terminal Flag-tag                                                                                                                                                                                                  | This study     |
| PA01 PA0847-Flag                             | PA01 containing PA0847 with a chromosomal C-terminal Flag-tag                                                                                                                                                                                                  | This study     |
| PA01 PA4332-Flag                             | PA01 containing PA4332 with a chromosomal C-terminal Flag-tag                                                                                                                                                                                                  | This study     |
| PA01 PA5487-Flag                             | PA01 containing PA5487 with a chromosomal C-terminal Flag-tag                                                                                                                                                                                                  | This study     |
| <i>Plasmids</i>                              |                                                                                                                                                                                                                                                                |                |
| pCR2.1-TA                                    | Cloning plasmid, Ap <sup>R</sup> , Km <sup>R</sup>                                                                                                                                                                                                             | Invitrogen     |
| pBBR1MCS-4                                   | Broad host range vector, Ap <sup>R</sup>                                                                                                                                                                                                                       | (7)            |
| pBBR1MCS-4- <i>sadC</i>                      | <i>sadC</i> cloned into pBBR1MCS-4 (ApaI/BamHI)                                                                                                                                                                                                                | This study     |
| pBBR1MCS-4- <i>ladS</i>                      | <i>ladS</i> cloned into pBBR1MCS-4                                                                                                                                                                                                                             | (6)            |
| pBBR1MCS-4- <i>hsbR</i>                      | <i>hsbR</i> cloned into pBBR1MCS-4                                                                                                                                                                                                                             | (5)            |

| Strain/Plasmid/Primer               | Relevant characteristics <sup>a</sup>                                                                         | Source     |
|-------------------------------------|---------------------------------------------------------------------------------------------------------------|------------|
| pKNG101                             | Suicide vector carrying <i>sacB</i> , <i>SmR</i>                                                              | (8)        |
| pKNG101- $\Delta$ PA0338            | Mutator fragment for deletion of PA0338 (from amino acid 2 to 367), <i>Sm<sup>R</sup></i>                     | This study |
| pKNG101- $\Delta$ sadC              | Mutator fragment for deletion of <i>sadC</i> (from amino acid 87 to 414), <i>Sm<sup>R</sup></i>               | This study |
| pKNG101- $\Delta$ sadB              | Mutator fragment for deletion of <i>sadB</i> (from amino acid 4 to 467), <i>Sm<sup>R</sup></i>                | This study |
| pKNG101- $\Delta$ bifA              | Mutator fragment for deletion of <i>bifA</i> (from amino acid 4 to 657), <i>Sm<sup>R</sup></i>                | This study |
| P <sub>cdrA</sub> - <i>gfp</i>      | Plasmid expressing <i>gfp</i> from the promoter of <i>cdrA</i> , Ap <sup>R</sup> , Gm <sup>R</sup>            | (9)        |
| pME3087                             | Tet <sup>R</sup> , suicide vector for allelic replacement; <i>ColE1</i> -replicon, <i>IncP-I</i> , <i>Mob</i> | (10)       |
| pME3087-0338-Flag                   | pME3087 with the cassette for introducing a c-terminal Flag-tag on PA0338 (BamHI/EcoRI)                       | This study |
| pME3087-0847-Flag                   | pME3087 with the cassette for introducing a c-terminal Flag-tag on PA0847 (BamHI/HinDIII)                     | This study |
| pME3087-4332-Flag                   | pME3087 with the cassette for introducing a c-terminal Flag-tag on PA4332 (BamHI/HinDIII)                     | This study |
| pME3087-5487-Flag                   | pME3087 with the cassette for introducing a c-terminal Flag-tag on PA5487 (BamHI/EcoRI)                       | This study |
| pME6918                             | Tet <sup>R</sup> , <i>rsmY</i> under Ptac promoter at position +1 in pME6032                                  | (11)       |
| pME3849                             | Gm <sup>R</sup> , <i>rsmA</i> under Plac promoter in pME6001 (BamHI/SmaI)                                     | (12)       |
| <i>Primers for qRT-PCR</i>          |                                                                                                               |            |
| qGyrAF                              | AACGACTGGAACAAGCCCTACA                                                                                        | This study |
| qGyrAR                              | GCGCACGATGGTGTGCGTA                                                                                           | This study |
| qPcrVF                              | AGTGGGATCTGCGGAGTT                                                                                            | This study |
| qPcrVR                              | TGGGTCTGCAGGACATCCTT                                                                                          | This study |
| qHsiA1F                             | ATCGCCTGCTCGAGTATTACG                                                                                         | This study |
| qHsiA1R                             | GGGATGAGATTCTCACGATTT                                                                                         | This study |
| qPA0338F                            | GAGCGTGGAGACCTGGAAGA                                                                                          | This study |
| qPA0338R                            | GCAGTATTCCGGGCTTTTCG                                                                                          | This study |
| <i>Primers for deletion mutants</i> |                                                                                                               |            |
| 1PA0338F                            | GACTTCCTTTTCGGTTCGGTTC                                                                                        | This study |
| 2PA0338R                            | ATCGCGACGCACGACGAAGCGTCC                                                                                      | This study |
| 3PA0338F                            | TTCGTCGTGCGTCGCGATTGCGTG                                                                                      | This study |
| 4PA0338R                            | CCATCAGCTCTGGCACTACA                                                                                          | This study |
| 5PA0338F                            | ATCCTGCTGCCGATGATCT                                                                                           | This study |
| 6PA0338R                            | ACTATTCGGCTTCAACCTG                                                                                           | This study |
| 1SadCF                              | TATCGTCGACGCTCATGGTA                                                                                          | This study |
| 2SadCR                              | TTCCAGCTGAGCGGACCGCGGATTTATC                                                                                  | This study |
| 3SadCF                              | CGGTCCGCTCAGCTGGAAAGCTGTTGCGA                                                                                 | This study |
| 4SadCR                              | TCAGGATCGAAAGGCTGCAA                                                                                          | This study |
| 5SadCF                              | ATGGTCGGTACGGTTTTTCAG                                                                                         | This study |
| 6SadCR                              | CTCCACAGCAGCAGGTGCT                                                                                           | This study |
| 1SadBF                              | ACTGCGTGCTGCTCTACCAC                                                                                          | This study |
| 2SadBR                              | TCACCCCGTTCTGTCTATGACGAGACCATG                                                                                | This study |

| Strain/Plasmid/Primer                   | Relevant characteristics <sup>a</sup>                                                                     | Source     |
|-----------------------------------------|-----------------------------------------------------------------------------------------------------------|------------|
| 3SadBF                                  | ATGACAGAACCGGGGTGACCGGGTAG                                                                                | This study |
| 4SadBR                                  | GGCAAGGACCTGGTGTCCAGTT                                                                                    | This study |
| 5SadBF                                  | CAACGCCAGCCTGATGAT                                                                                        | This study |
| 6SadBR                                  | CGTCTTCTCCTGTGGATGCT                                                                                      | This study |
| 1BifAF                                  | GCTGGCTGGTGAAGAAGG                                                                                        | This study |
| 2BifAR                                  | GCTGTACAGCAGTTTCAAGGGGCCTTCCT                                                                             | This study |
| 3BifAF                                  | TTGAAACTGCTGTACAGCAAGCCGCTGC                                                                              | This study |
| 4BifAR                                  | GTCGCCAGGGACTCGATG                                                                                        | This study |
| 5BifAF                                  | GGCTCCTTCGACAAGTTCAA                                                                                      | This study |
| 6BifAR                                  | CTCTACCGCTACACCGAGGA                                                                                      | This study |
| <i>Primers for cloning of sadC</i>      |                                                                                                           |            |
| sadCF                                   | TTCACACAGGAAAAGGAGATGAACTGCAGGGC                                                                          | This study |
| sadCR                                   | GATCGAAAGGCTGCAACAC                                                                                       | This study |
| <i>Primers introduction of Flag-tag</i> |                                                                                                           |            |
| PA0338Flag up F<br>BamHI                | GACCTGGAAGAGGATCCTCCATCC                                                                                  | This study |
| PA0338Flag up R                         | CTATTTATCGTCGTCATCTTTGTAGTCGATATCATGATCTTT<br>ATAATCACCGTCATGGTCTTTGTAGTCGAAGCAACAGG<br>CCACGCAATCGC      | This study |
| PA0338Flag down F                       | GACTACAAAGACCATGACGGTGATTATAAAGATCATGATA<br>TCGACTACAAAGATGACGACGATAAATAGTAAAGGTC<br>AGCCTGGCGGCAGCACCAG  | This study |
| PA0338Flag down R<br>EcoRI              | CCAACCGTGACGAATTCTATGCC                                                                                   | This study |
| PA0847Flag up F<br>BamHI                | CCATCCCTACTAGGATCCGCTC                                                                                    | This study |
| PA0847Flag up R                         | CTATTTATCGTCGTCATCTTTGTAGTCGATATCATGATCTTT<br>ATAATCACCGTCATGGTCTTTGTAGTCGAAGGCTGGCG<br>CCTGGTACAGGCAATAG | This study |
| PA0847Flag down F                       | GACTACAAAGACCATGACGGTGATTATAAAGATCATGATA<br>TCGACTACAAAGATGACGACGATAAATAGTAAATGCGCG<br>GACAAACAGG         | This study |
| PA0847Flag down R<br>HinDIII            | CATCCAGATGCCGAAAAGCTTCCACAG                                                                               | This study |
| PA4332Flag up F<br>BamHI                | CGTTCATCGCTTTTTCCGGATCCTACCTG                                                                             | This study |
| PA4332Flag up R                         | CTATTTATCGTCGTCATCTTTGTAGTCGATATCATGATCTTT<br>ATAATCACCGTCATGGTCTTTGTAGTCGAAGGCACTGG<br>TGACCTCCCAGG      | This study |
| PA4332 Flag down F                      | GACTACAAAGACCATGACGGTGATTATAAAGATCATGATA<br>TCGACTACAAAGATGACGACGATAAATAGTAAAGTGCCTGA<br>CATACGGGTCCG     | This study |
| PA4332Flag down R<br>HinDIII            | CAGGTGAAGCTTCTGGATCG                                                                                      | This study |
| PA5487Flag up F<br>BamHI                | GTCAGTGGCCTGGATCCCAGCGTGC                                                                                 | This study |
| PA5487Flag up R                         | CTATTTATCGTCGTCATCTTTGTAGTCGATATCATGATCTTT<br>ATAATCACCGTCATGGTCTTTGTAGTCGAAGGCCACTT<br>CCAGGCGGTCCC      | This study |
| PA5487Flag down F                       | GACTACAAAGACCATGACGGTGATTATAAAGATCATGATA                                                                  | This study |

| Strain/Plasmid/Primer      | Relevant characteristics <sup>a</sup>                    | Source     |
|----------------------------|----------------------------------------------------------|------------|
|                            | TCGACTACAAAGATGACGACGATAAATAGTAAAGGGCGAC<br>CAGCGCACATTC |            |
| PA5487Flag down R<br>EcoRI | CGAGGGAATTCTGGAGGAAC                                     | This study |

<sup>a</sup>Ap<sup>R</sup>, Ampicillin resistance; Str<sup>R</sup>, Streptomycin resistance; Km<sup>R</sup>, Kanamycin resistance; Gm<sup>R</sup>, Gentamicin resistance; Tet<sup>R</sup>, Tetracyclin resistance.

## References

1. **Herrero M, de Lorenzo V, Timmis KN.** 1990. Transposon vectors containing non-antibiotic resistance selection markers for cloning and stable chromosomal insertion of foreign genes in gram-negative bacteria. *J Bacteriol* **172**:6557-6567.
2. **Goodman AL, Merighi M, Hyodo M, Ventre I, Filloux A, Lory S.** 2009. Direct interaction between sensor kinase proteins mediates acute and chronic disease phenotypes in a bacterial pathogen. *Genes Dev* **23**:249-259.
3. **Vasseur P, Vallet-Gely I, Soscia C, Genin S, Filloux A.** 2005. The pel genes of the *Pseudomonas aeruginosa* PAK strain are involved at early and late stages of biofilm formation. *Microbiology* **151**:985-997.
4. **Sadovskaya I, Vinogradov E, Li J, Hachani A, Kowalska K, Filloux A.** 2010. High-level antibiotic resistance in *Pseudomonas aeruginosa* biofilm: the ndvB gene is involved in the production of highly glycerol-phosphorylated beta-(1->3)-glucans, which bind aminoglycosides. *Glycobiology* **20**:895-904.
5. **Bordi C, Lamy MC, Ventre I, Termine E, Hachani A, Fillet S, Roche B, Bleves S, Mejean V, Lazdunski A, Filloux A.** 2010. Regulatory RNAs and the HptB/RetS signalling pathways fine-tune *Pseudomonas aeruginosa* pathogenesis. *Mol Microbiol* **76**:1427-1443.
6. **Ventre I, Goodman AL, Vallet-Gely I, Vasseur P, Soscia C, Molin S, Bleves S, Lazdunski A, Lory S, Filloux A.** 2006. Multiple sensors control reciprocal expression of *Pseudomonas aeruginosa* regulatory RNA and virulence genes. *Proc Natl Acad Sci U S A* **103**:171-176.
7. **Kovach ME, Elzer PH, Hill DS, Robertson GT, Farris MA, Roop RM, 2nd, Peterson KM.** 1995. Four new derivatives of the broad-host-range cloning vector pBBR1MCS, carrying different antibiotic-resistance cassettes. *Gene* **166**:175-176.
8. **Kaniga K, Delor I, Cornelis GR.** 1991. A wide-host-range suicide vector for improving reverse genetics in gram-negative bacteria: inactivation of the blaA gene of *Yersinia enterocolitica*. *Gene* **109**:137-141.
9. **Rybtke MT, Borlee BR, Murakami K, Irie Y, Hentzer M, Nielsen TE, Givskov M, Parsek MR, Tolker-Nielsen T.** 2012. Fluorescence-based reporter for gauging cyclic di-GMP levels in *Pseudomonas aeruginosa*. *Appl Environ Microbiol* **78**:5060-5069.
10. **Voisard C, Bull CT, Keel C, Laville J, Maurhofer M, Schnider U, Defago G, Haas D.** 1994. Biocontrol of Root Diseases by *Pseudomonas-Fluorescens* Cha0 -

Current Concepts and Experimental Approaches. *Molecular Ecology of Rhizosphere Microorganisms*:67-89.

11. **Valverde C, Heeb S, Keel C, Haas D.** 2003. RsmY, a small regulatory RNA, is required in concert with RsmZ for GacA-dependent expression of biocontrol traits in *Pseudomonas fluorescens* CHA0. *Mol Microbiol* **50**:1361-1379.
12. **Pessi G, Williams F, Hindle Z, Heurlier K, Holden MT, Camara M, Haas D, Williams P.** 2001. The global posttranscriptional regulator RsmA modulates production of virulence determinants and N-acylhomoserine lactones in *Pseudomonas aeruginosa*. *J Bacteriol* **183**:6676-6683.
